# Supplementary material
Source: publisher site journal article supplement (https://www.spandidos-publications.com/3567/downloadSupplementary)
Supplement: Supplementary file 1 [file downloadSupplementary]

Figure S1. Continued.

A

B381

|                            | Yield (gigabases) | %Bases>=Q30 |
|----------------------------|-------------------|-------------|
| Passing filter             | 137.5             | 88.3%       |
| Passing filter and aligned | 122.3             | 89.0%       |

|                 | Mean Coverage | % Positions>=1X Coverage | % Positions>=10X Coverage |
|-----------------|---------------|--------------------------|---------------------------|
| Non-N reference | 40.7          | 98.0%                    | 95.2%                     |
| Genes           | 41.4          | 98.7%                    | 96.9%                     |
| Exons           | 40.7          | 97.9%                    | 96.6%                     |

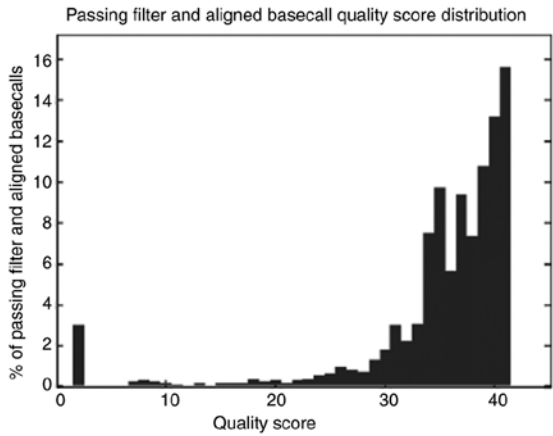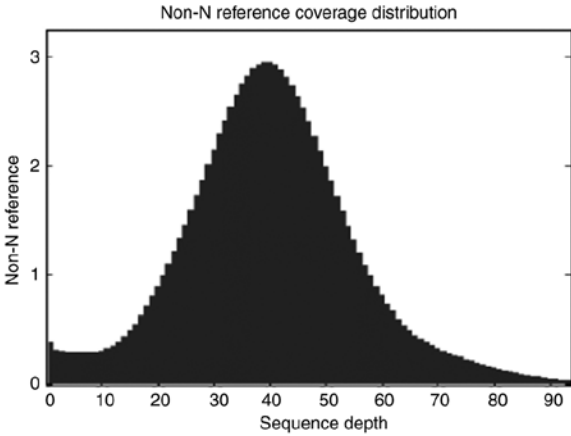

B

B450

|                            | Yield (gigabases) | %Bases>=Q30 |
|----------------------------|-------------------|-------------|
| Passing filter             | 116.3             | 90.2%       |
| Passing filter and aligned | 104.0             | 90.7%       |

|                 | Mean Coverage | % Positions>=1X Coverage | % Positions>=10X Coverage |
|-----------------|---------------|--------------------------|---------------------------|
| Non-N reference | 35.0          | 98.3%                    | 96.0%                     |
| Genes           | 34.9          | 98.9%                    | 97.1%                     |
| Exons           | 34.1          | 98.0%                    | 96.8%                     |

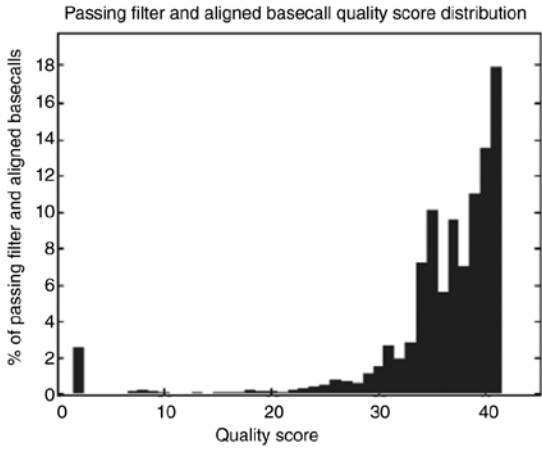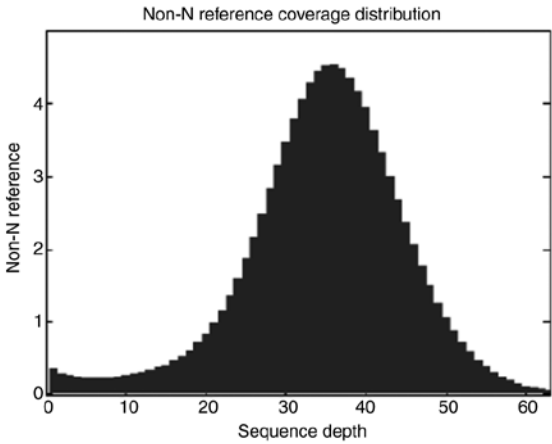

Figure S1. Data volume and coverage summaries. The samples had a high quality score with a percentage base calling of >Q30 indicating a smaller probability of error following alignment to the human reference genome (NCBI37). The passing filters gave the yield in Gigabases of data from the samples input into the NCBI37 reference genome, while the passing filter and aligned reported only the subset of data in Gigabases that aligned to the NCBI37 reference genome. (A) Sample B381 had 89.0% of filtered and aligned reads with a mean depth of coverage of 40.7. (B) Sample B450 had 90.7% of filtered and aligned reads with a mean depth of coverage of 35.0. (C) Sample M456 had 89.3% of filtered and aligned reads with a mean depth of coverage of 33.6. (D) Sample M478 had 88.3% of filtered and aligned reads with a mean depth of coverage of 34.2.

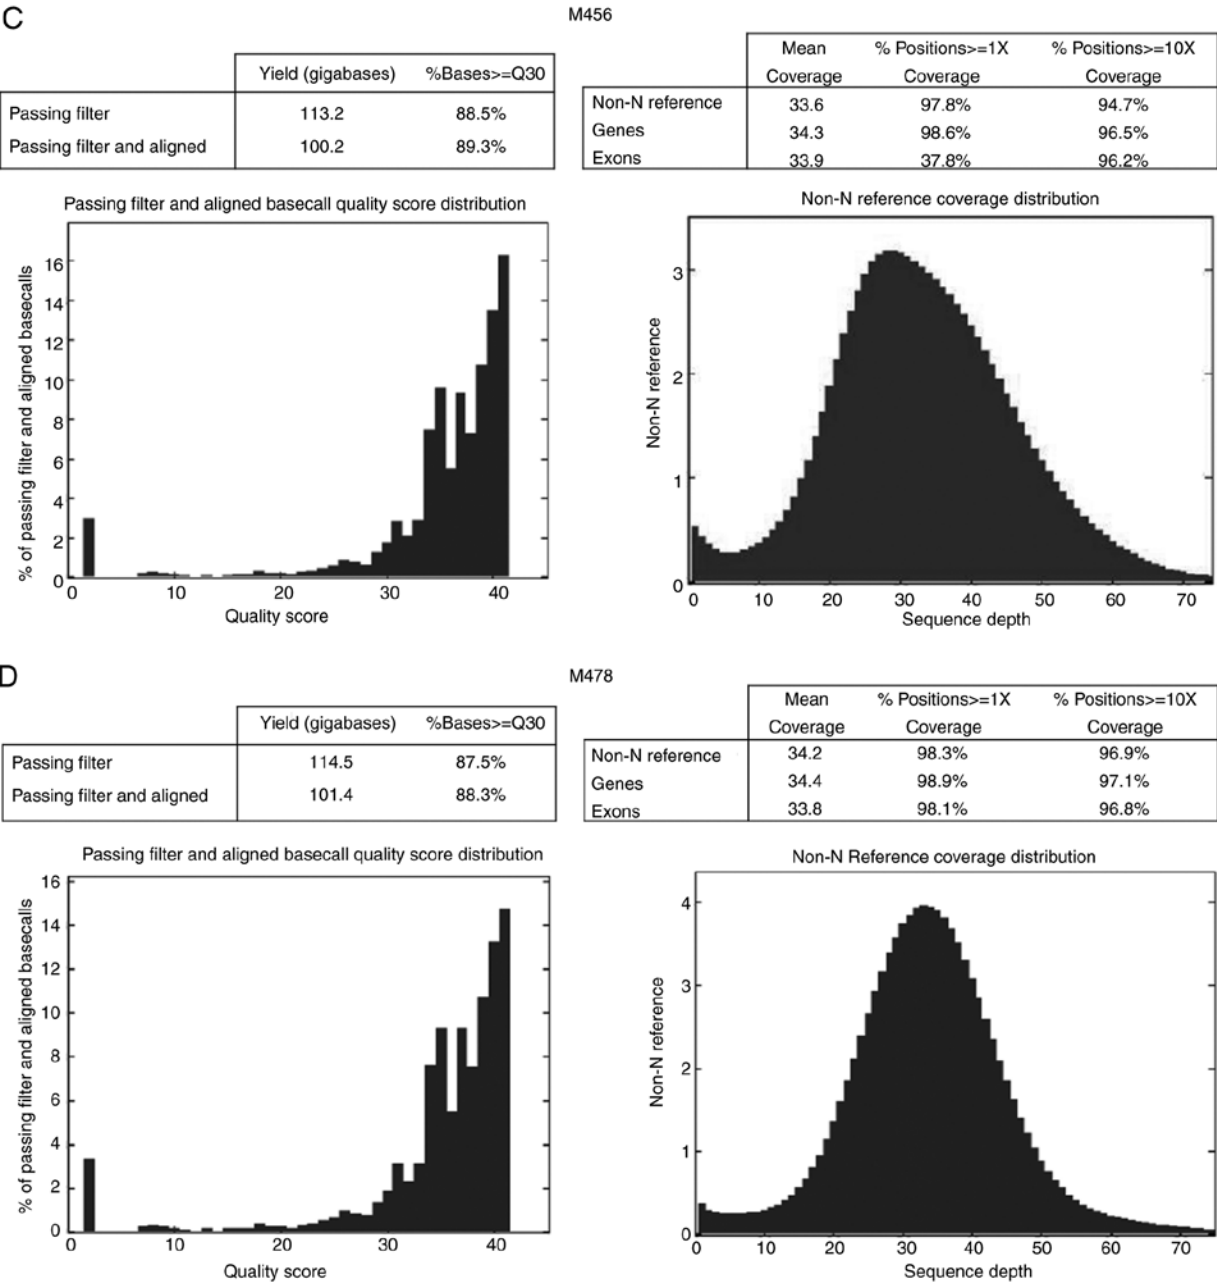

Figure S2. Untrimmed western blots showing the entire lane. Representative raw data of full western blots of (A) BCLAF1, (B) Caspase-3, (C) Caspase-9 (D) BAX, (E) p53, (F) p21, (G) EXO1 and (H) BCL2 proteins. Separate amplification of GAPDH served as a housekeeping gene to control for loading in each set of experiments. BCLAF1, BCL2 associated transcription factor 1; EXO1, exonuclease 1; siRNA, small interfering RNA.

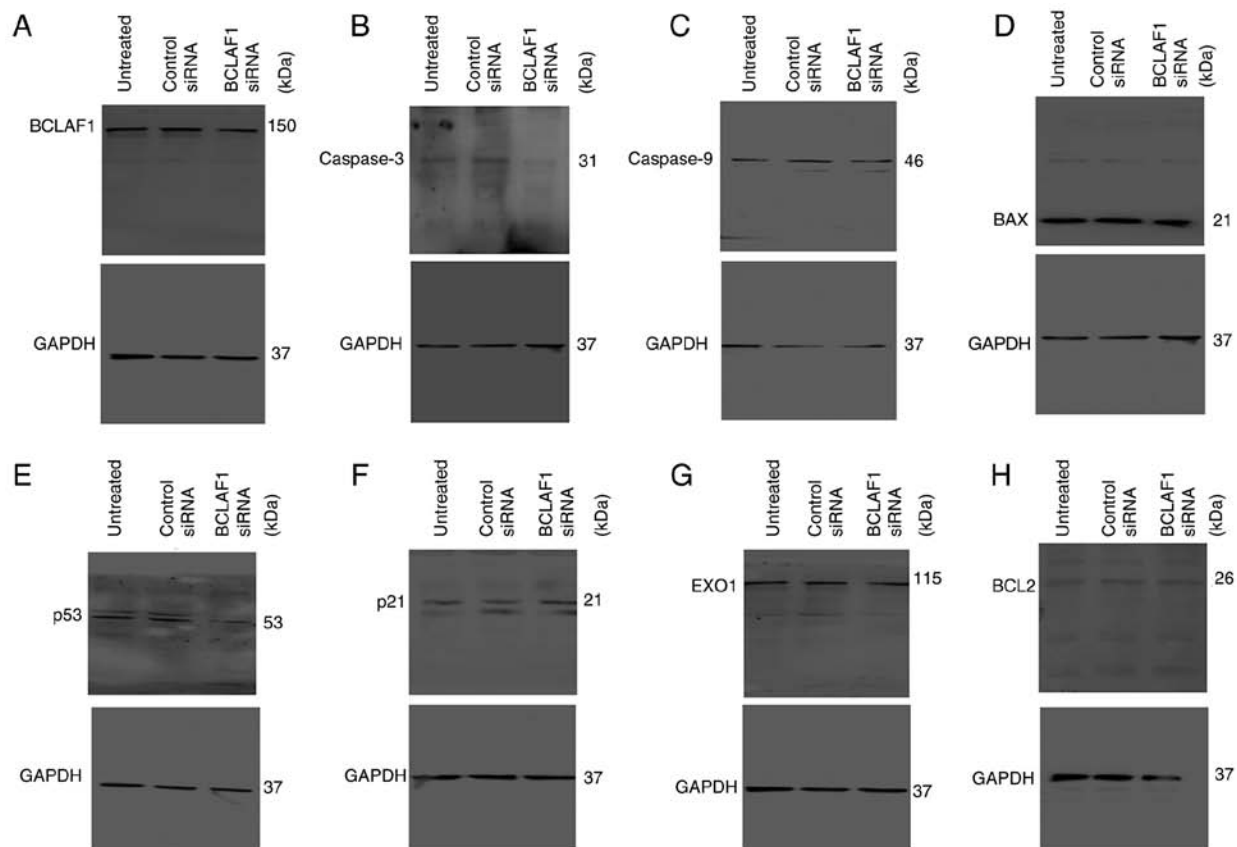

Table SI. Sequence coverage and quality indicators for whole genome sequencing of four tumour samples.

| Sequence coverage/quality measures     | B381          | B450          | M456          | M478          |
|----------------------------------------|---------------|---------------|---------------|---------------|
| Reference genome length                | 3,095,693,981 | 3,095,693,981 | 3,095,693,981 | 3,095,693,981 |
| Proportion duplicate reads             | 0.02          | 0.02          | 0.02          | 0.02          |
| Proportion unique reads                | 0.98          | 0.98          | 0.98          | 0.98          |
| Mean depth of coverage                 | 40.7          | 35.0          | 33.7          | 34.2          |
| Median fragment length, bp             | 320           | 301           | 311           | 314           |
| Fragment length standard deviation, bp | 63            | 62            | 62            | 65            |

All four samples were aligned to the human reference genome (NCBI37) using ELAND and CASAVA software. Duplication rate of the reads was only 2%, while 98% were unique reads, thus allowing for a greater confidence in variant calling. Following paired end sequencing, all samples achieved a median targeted fragment length of >300 bp and fragment length standard deviation around the median of >60 bp.

Table SII. Sequences of the BCLAF siRNA duplexes used to knock down the expression of BCLAF1.

| siRNA                                                                                                    | Sequences (5'→3')                                                |
|----------------------------------------------------------------------------------------------------------|------------------------------------------------------------------|
| BCLAF-1                                                                                                  | F: CAAGAAUCCGAAUCCAUCU[dT][dT]<br>R: AGAUGGAUCGGAAUUCUUG[dT][dT] |
| BCLAF-2                                                                                                  | F: CGAUGAAUUUAAUAAGUCA[dT][dT]<br>R: UGACUUAUUAAAUCAUCG[dT][dT]  |
| BCLAF-3                                                                                                  | F: CAGUACAGUUCACUCUGCA[dT][dT]<br>R: UGCAGAGUGAACUGUACUG[dT][dT] |
| BCLAF1, BCL2 associated transcription factor 1;<br>siRNA, small interfering RNA; F, forward; R, reverse. |                                                                  |

Table SIII. Primer sequences used in reverse transcription-quantitative PCR and annealing temperatures.

| Primer    | Sequences (5'→3')                                             | Annealing temperature, °C |
|-----------|---------------------------------------------------------------|---------------------------|
| ATRIP     | F: AGGCTGCTAACCTCTGTGGA<br>R: CAGAGACTCCCAGCAAGGTC            | 56                        |
| BACH1     | F: CTGCCACCTCCCAACATAGT<br>R: GAGATGCAGCACAGACCAAA            | 59                        |
| BCL2      | F: CTGCACCTGACGCCCTTCACC<br>R: CACATGACCCCAACGAACTCAAAGA      | 61                        |
| BCLAF1    | F: CGCGTCGAAGGTAGCTCTAT<br>R: TTGGAGCGACCCATTTCTTTT           | 59                        |
| BCL-XL    | F: GATCCCCATGGCAGCAGTAAAGCAAG<br>R: CCCCATCCCGGAAGAGTTCATTCCT | 58                        |
| BRCA1     | F: GGCTATCCTCTCAGAGTGACATTTTA<br>R: GCTTTATCAGGTTATGTTGCATGGT | 60                        |
| Caspase-3 | F: ACATGACTCAGCCTGTTCC<br>R: GCCTCACCACCTTTAGAA               | 60                        |
| Caspase-9 | F: GTGAACTTCTGCCGTGAGTC<br>R: GCAAAGCCAGCACCATTTTC            | 59                        |
| EXO1      | F: CTCAAGTGGGAGAGGCTTTG<br>R: AACGCTGTCCTGGAAGAGAA            | 62                        |
| GAPDH     | F: GGCTCTCCAGAACATCATCC<br>R: GCCTGCTTCACCACCTTC              | 59                        |
| H2AX      | F: TCCCTTCCAGCAAACTCA<br>R: TCTAAAACTCCCCAAATGC               | 60                        |
| Ku70      | F: GGCTGTGGTGTCTATGG<br>R: CCCTTAAACTGGTCAAGC                 | 61                        |
| P21       | F: ACCTCACCTGCTCTGCTGC<br>R: ATTAGGGCTTCCTCTTGGAGA            | 65                        |
| P53       | F: CATCATCACACTGGAAGACTCC<br>R: CAGTGCTCGCTTAGTGCTCC          | 63                        |

BCLAF1, BCL2 associated transcription factor 1; BACH1, transcription regulator protein BACH1; ATRIP, ATR-interacting protein; EXO1, exonuclease 1; F, forward; R, reverse.

Table SIV. Semi-quantification of western blotting results.

A, Western blot analysis presented in Fig. 3D

| Protein   | Untreated | Control siRNA | BCLAF1 siRNA  |
|-----------|-----------|---------------|---------------|
| BCLAF1    | 1         | 0.8914±0.0059 | 0.6923±0.0045 |
| BAX       | 1         | 0.8411±0.0011 | 0.7263±0.0024 |
| Caspase-3 | 1         | 0.8231±0.0031 | 0.5203±0.0076 |
| Caspase-9 | 1         | 0.9065±0.0076 | 0.8795±0.0008 |
| GAPDH     | 1         | 0.9811±0.0006 | 0.9751±0.0036 |

B, Western blot analysis presented in Fig. 4D

| Protein | Untreated | Control siRNA | BCLAF1 siRNA  |
|---------|-----------|---------------|---------------|
| BCLAF1  | 1         | 0.7953±0.0040 | 0.6357±0.0007 |
| BCL2    | 1         | 0.9132±0.0037 | 0.8722±0.0099 |
| P53     | 1         | 0.9731±0.0046 | 0.6721±0.0016 |
| P21     | 1         | 0.7813±0.0009 | 0.8113±0.0021 |
| GAPDH   | 1         | 0.9502±0.0005 | 0.9508±0.0018 |

C, Western blot analysis presented in Fig. 5F

| Protein | Untreated | Control siRNA | BCLAF1 siRNA  |
|---------|-----------|---------------|---------------|
| BCLAF1  | 1         | 0.8107±0.0003 | 0.6105±0.0002 |
| EXO1    | 1         | 0.9116±0.0091 | 0.8711±0.0016 |
| H2AX    | 1         | 0.8714±0.0014 | 0.7688±0.0064 |
| GAPDH   | 1         | 0.9636±0.0007 | 0.9735±0.0004 |

BCLAF1, BCL2 associated transcription factor 1; EXO1, exonuclease 1; siRNA, small interfering RNA. The table shows the semi-quantification of the western blot images for Figs. 3D, 4D and 5F generated using ImageJ software and normalized to 1 with the untreated sample. Data are expressed as the mean ± standard deviation (n=3).
